# Supplementary material
Source: PubMed Central journal article supplement (PMC6509501)
Supplement: supp_RA118.007257_142726_1_supp_301008_pqf4qz.pdf [file supp_RA118.007257_142726_1_supp_301008_pqf4qz.pdf]

# Supplementary Figure 1

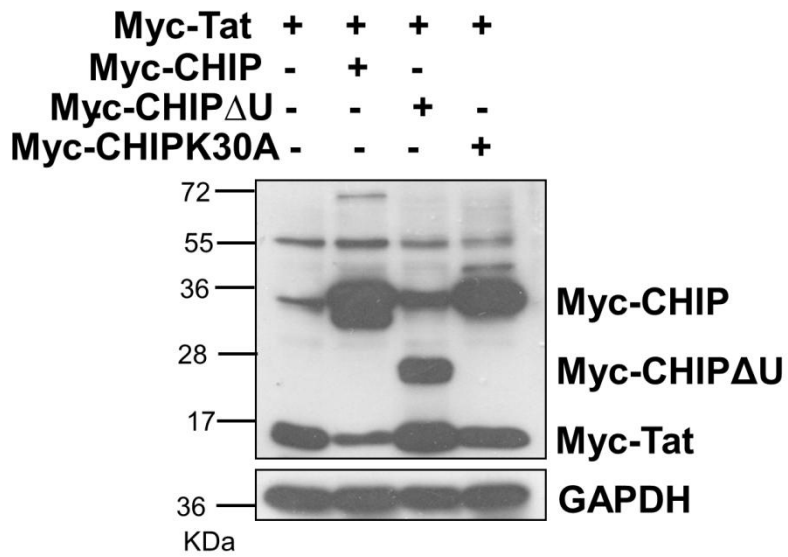

## Supplementary Figure 2

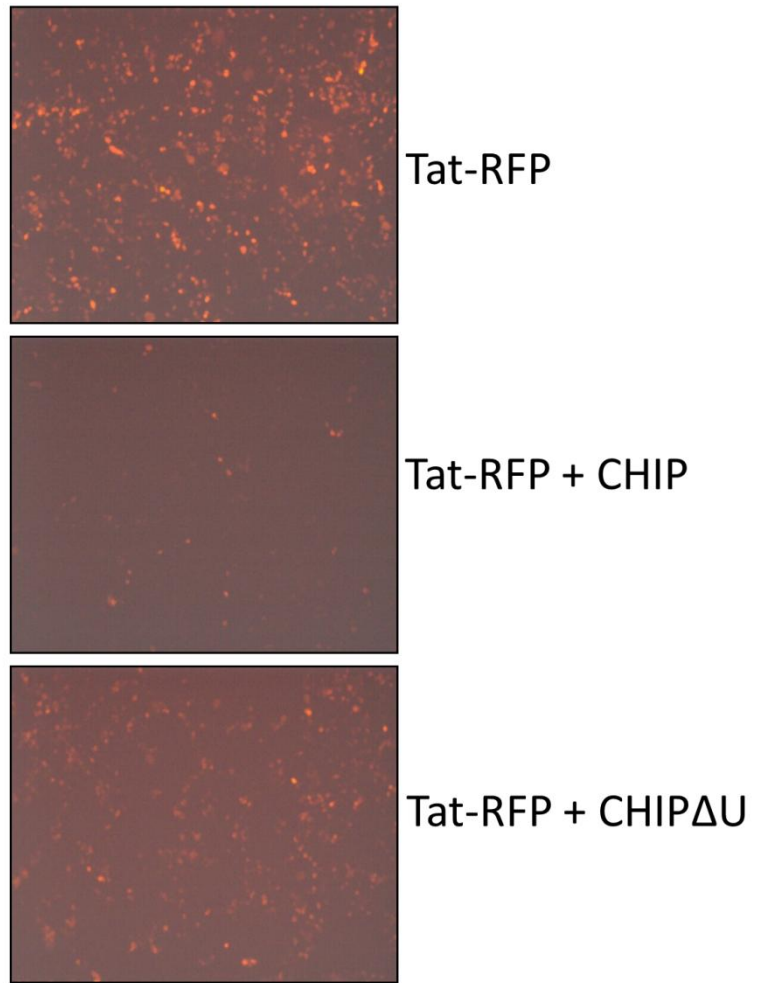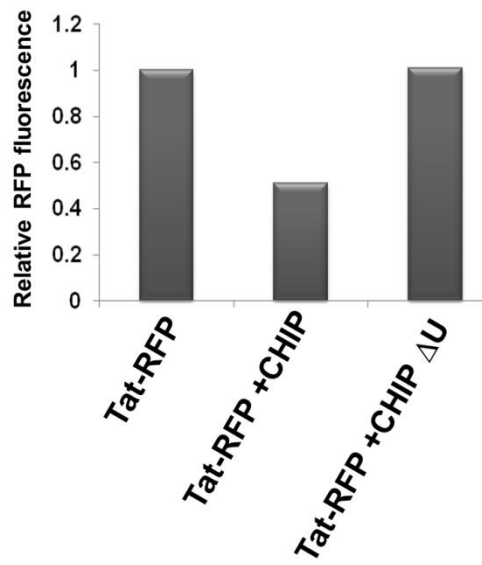

# Supplementary Figure 3

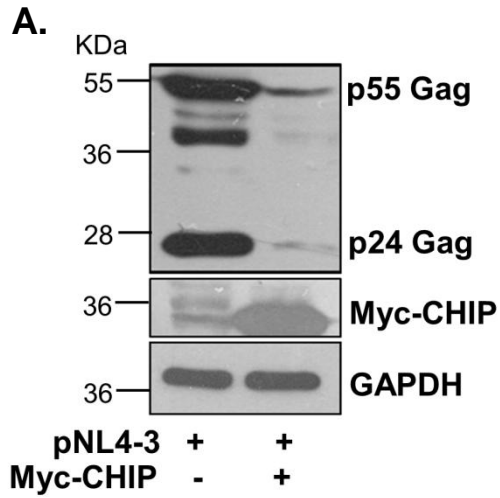

**B.**

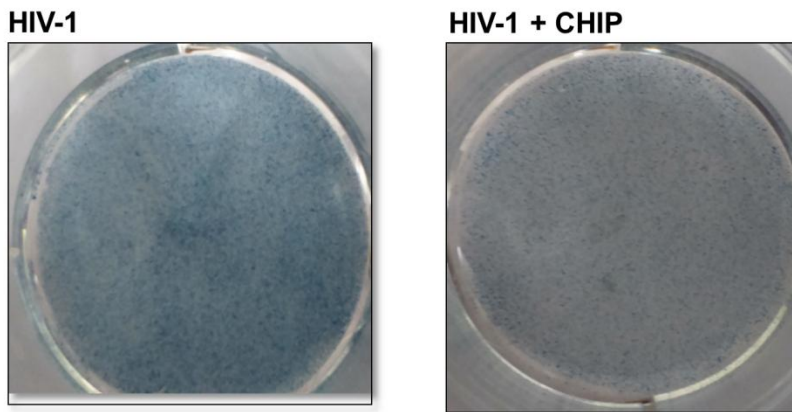

**C.**

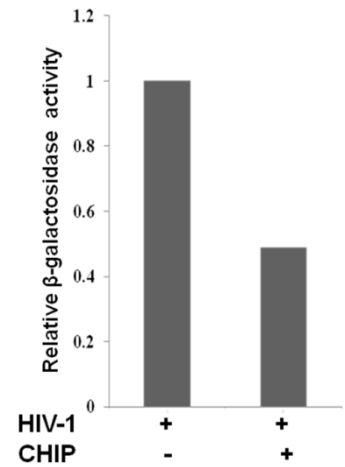

**D.**

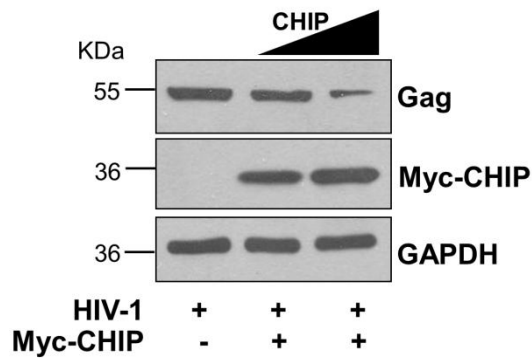

## Supplementary Figure 4

**A.**

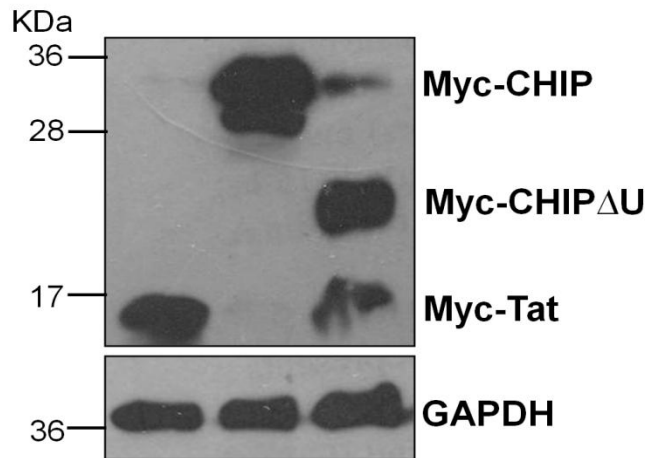

Figure representing the continuous version of Fig. 2A.

**B.**

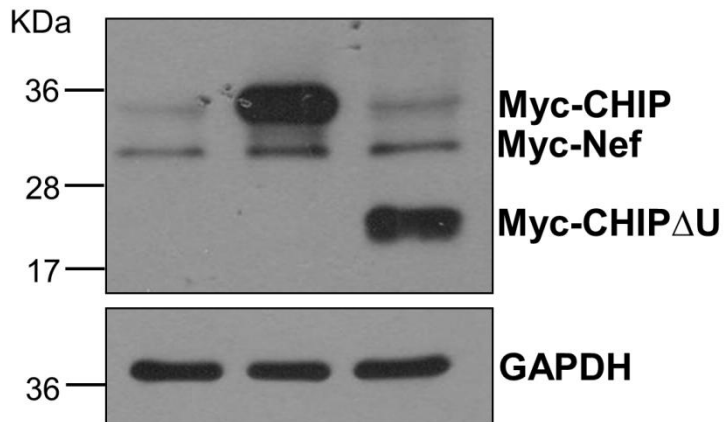

Figure representing the continuous version of Fig. 2C.

## Supplementary Table 1.

| S.N. | Oligonucleotides          | Sequence                        |
|------|---------------------------|---------------------------------|
| 1.   | CHIP sgRNA 1 Forward      | 5' CACCGAGGAGCTCGCTGCTGCAGCT 3' |
| 2.   | CHIP sgRNA 1 Reverse      | 5' AAACAGCTGCAGCAGCGAGCTCCTC 3' |
| 3.   | CHIP sgRNA 2 Forward      | 5' CACCGGACACCTTCACTGGCCTGGT 3' |
| 4.   | CHIP sgRNA 2 Reverse      | 5' AAACACCAGGCCAGTGAAGGTGTCC 3' |
| 5.   | Scrmabled sgRNA 1 Forward | 5' CACCGGAAAGGCCCGGCCATTCT 3'   |
| 6.   | Scrmabled sgRNA 1 Reverse | 5' AAACAGAATGGCGCCGGGCCTTCC 3'  |
